# Supplementary material for: Metabolic engineering of microbes for branched-chain biodiesel production with low-temperature property
Source: PubMed Central journal article supplement (PMC4483204; doi:10.1186/s13068-015-0270-7), 2015-06-24
Supplement: 13068_2015_270_MOESM7_ESM.pdf [file 13068_2015_270_MOESM7_ESM.pdf]

**The sequence of *ws/dgat* gene synthesized using GenScript (Nanjing, China):**

ATGAGACCATTACACCCTATTGATTTCATTTTCTTGTCTTTGGAAAAGAGAC  
AACAAACCAATGCATGTTGGTGGTTTGTTTTTATTCCAAATCCCAGATAATGC  
ACCTGACACTTTTATTCAAGATTTGGTCAACGACATAAGAATCTCAAAGTC  
CATTCTGTTCACCTTTCAATAACAAGTTGAACGGTTTATTTTGGGATGAA  
GACGAAGAATTTGATTTGGACCATCACTTTAGACATATAGCTTTACCACACC  
CTGGTAGAATCAGAGAATTGTTGATCTATATCTCCCAAGAACATAGTACTTT  
GTTGGATAGAGCAAAGCCATTGTGGACATGTAACATCATCGAAGGTATCGA  
GGGTAACAGATTTGCCATGTACTTCAAGATACATCACGCAATGGTAGATGGT  
GTCGCCGGTATGAGATTGATCGAAAATCTTTGTCTCACGACGTTACCGAA  
AAGTCTATTGTCCCACCTTGGTGC GTTGAAGGTAAAAGAGCTAAGAGATTA  
AGAGAACCAAAGACTGGTAAAATTAAGAAAATTATGTCTGGTATCAAATCA  
CAATTGCAAGCAACTCCTACAGTAATTCAAGAATTGTCACAAACAGTCTTC  
AAGGATATAGGTAGAAATCCAGACCATGTTTCTTCATTTCAAGCACCTTGTT  
CTATTTTGAACCAAAGAGTATCCAGTTCTAGAAGATTTGCTGCACAATCCTT  
CGATTTGGACAGATTCAGAAACATCGCCAAGAGTTTGAACGTTACCATAAA  
CGATGTTGTATTAGCTGTATGCTCTGGTGCCTTGAGAGCTTATTTGATGTCAC  
ATAATTCCTTGCCTAGTAAGCCTTTAATCGCTATGGTACCAGCATCAATTAGA  
AATGATGACTCTGATGTCTCAAACAGAATCACAATGATCTTGGCAAATTTG  
GCCACCCACAAAGATGACCCTTTGCAAAGATTAGAAATCATCAGAAGATCC  
GTTCAAACAGTAAGCAAAGATTCAAGAGAATGACTTCTGATCAAATATTG  
AACTACTCAGCTGTCGTTTACGGTCCAGCAGGTTTAAACATAATCTCTGGTA  
TGATGCCTAAGAGACAAGCCTTTAATTTGGTTATTTCAAACGTACCAGGTCC  
TAGAGAACCATTATATTGGAATGGTGCCAAGTTGGATGCTTTATACCCTGCA  
TCCATAGTTTTTGGACGGTCAAGCTTTAAACATCACCATGACTTCTTACTTGG  
ATAAGTTAGAAGTTGGTTTGTATTGCCTGTAGAAATGCTTTACCAAGAATGCA  
AACTTGTTAACACATTTGGAAGAAGAAATCCAATTGTTTGAAGGTGTTAT  
CGCCAAGCAAGAAGACATTAAGACTGCCAACTAA

**The sequence of *alsS* gene synthesized using GenScript (Nanjing, China):**

ATGACAAAGGCCACCAAGGAGCAGAAGAGCCTGGTGAAGAACCGCGGTG  
CCGAACTGGTTGTTGACTGCCTGGTGGAAACAGGGCGTGACCCACGTGTTC  
GGCATTCCGGGCGCAAAGATCGATGCCGTGTTTCGACGCCCTGCAGGACAA  
GGGCCCGGAGATTATTGTTGCCCGCCATGAACAGAATGCCGCCTTCATGGC  
ACAAGCCGTTGGCCGCTTAACAGGCAAGCCGGGCGTGGTTTTAGTTACCA  
GCGGTCCGGGTGCAAGCAATTTAGCAACAGGCCTGCTGACAGCCAACACC  
GAAGGTGACCTGTGGTGGCCCTGGCAGGCAATGTGATCCGCGCAGATCG  
CCTGAAACGCACCCACCAAAGTCTGGATAACGCAGCCCTGTTCCAGCCGAT  
TACCAAGTATAGCGTGGAGGTTTCAGGACGTGAAGAACATCCCTGAGGCCG  
TGACCAACGCCTTTCGCATCGCAAGTGCAGGCCAGGCAGGCGCCGCCTTT  
GTGAGCTTCCCGCAGGATGTGGTGAACGAAGTGACCAACACCAAGAACGT  
GCGTGCAGTTGCCGCACCTAAGCTGGGCCCTGCCGCAGACGATGCAATTAG  
TGCCGCCATCGCAAAGATCCAGACCGCCAAGCTGCCTGTGGTTCTGGTGG  
GCATGAAAGGTGGCCGTCCTGAGGCAATCAAGGCAGTGCGCAAGCTGCTG  
AAAAAGGTGCAGCTGCCTTTCGTGGAGACCTACCAGGCCGCCGGTACTACT  
GAGCCGCGATCTGGAGGACCAGTACTTCGGTCGCATCGGCTTATTCCGCAA  
CCAGCCGGGCGACTTACTGCTGGAGCAAGCAGATGTGGTGCTGACCATCG  
GCTACGACCCGATCGAGTACGACCCTAAGTTCTGGAACATCAACGGTGACC  
GCACCATCATCCACCTGGACGAGATCATCGCAGACATTGATCACGCATAACC  
AGCCGGATCTGGAAGTATTGGTATATCCCGAGCACCATCAACCACATCG  
AACACGACGCCGTTAAGGTTGAGTTCGCAGAGCGCGAGCAGAAAATACTG  
AGTGACCTGAAGCAATACATGCATGAGGGCGAGCAAGTTCCGGCCGACTG  
GAAGAGTGATCGTGCCCATCCGCTGGAGATCGTGAAAGAACTGCGCAACG  
CCGTGGACGACCACGTGACAGTGACCTGCGACATTGGCAGTCATGCCATCT  
GGATGAGTCGCTACTTCCGTAGCTACGAGCCGCTGACCCTGATGATCAGCA  
ATGGCATGCAGACCCTGGGCGTGGCATTACCGTGGGCCATCGGTGCAAGCC  
TGGTGAAACCTGGCGAAAAGGTGGTGAAGCGTGAGCGGCGATGGTGGTTTT  
CTGTTACAGCGCAATGGAAGTGGAAACCGCCGTGCGTTTAAAGGCCCCGATC  
GTTACATCGTGTGGAACGACAGTACCTACGACATGGTGGCATTCCAGCAG  
CTGAAGAAGTATAACCGCACCAAGTGCCGTTGACTTTGGCAACATCGACATT

GTGAAGTACGCCGAGAGTTTCGGTGCCACAGGCTTACGCGTGGAAAGCCC  
GGATCAACTGGCCGATGTTCTGCGTCAGGGCATGAACGCCGAGGGCCCTG  
TGATTATCGACGTGCCGGTGGACTACAGCGATAACATCAATCTGGCAAGCG  
ACAAGCTGCCTAAGGAGTTTCGGCGAGCTGATGAAGACCAAAGCACTGTAA
